# Supplementary material
Source: ML conference proceedings conference paper supplement (https://aclanthology.org/D13-1073)
Supplement: Attachment [file appendix.pdf › additional/appendix.pdf]

# Appendices

author 1

July 2013

## Appendix A: Category Assignments for Volumes in ACL ARC

| Volume | Full Name                                                                 | Category   |
|--------|---------------------------------------------------------------------------|------------|
| A      | Applied Natural Language Processing / ANLP                                | Conference |
| C      | Coling                                                                    | Conference |
| D      | Empirical Methods for NLP / EMNLP                                         | Conference |
| E      | European Chapter of the ACL / EACL                                        | Conference |
| H      | Human Language Technologies / HLT                                         | Conference |
| I      | International Joint Conference on NLP / IJCNLP                            | Conference |
| J      | Computational Linguistics                                                 | Journal    |
| L      | Language Resources and Evaluation Conference / LREC                       | Conference |
| M      | Message Understanding Conference / MUC                                    | Conference |
| N      | North American Chapter of the ACL / NAACL                                 | Conference |
| O      | Republic of China Linguistics Conference / RocLing                        | Conference |
| P      | Association for Computational Linguistics Annual Meeting / ACL            | Conference |
| Q      | Transactions of the Association for Computational Linguistics TACL        | Journal    |
| R      | Recent Advances in NLP / RANLP                                            | Conference |
| S      | SemEval / *Sem                                                            | Conference |
| T      | Theoretical Issues in Natural Language Processing / TINLAP                | Conference |
| U      | Australasian Language Technology Association Meeting / ALTA               | Conference |
| W      | Workshops                                                                 |            |
| X      | TIPSTER TEXT PROGRAM / Tipster                                            | Conference |
| Y      | Pacific Asia Conference on Language, Information and Computation / Paclic | Conference |

Table 1: Category Assignments for Volumes in ACL ARC

## Appendix B: Extracted definitions for some terms

| Term | Definition                                                                                                                                                                                  |
|------|---------------------------------------------------------------------------------------------------------------------------------------------------------------------------------------------|
| HMM  | The hidden Markov model ( HMM ) formulation is a powerful statistical framework that is well-suited to the speech recognition problem .                                                     |
|      | HMM is a probabilistic finite state automaton used to model the probabilistic generation of sequential processes .                                                                          |
|      | HMM is one of the effective translation models ( Vogel et al. , 1996 ) , which is easily scalable to very large training corpus .                                                           |
| DM   | The detailed match ( DM ) is currently implemented as a beampruned depth-fast searched triphone tree .                                                                                      |
|      | A discourse model ( DM ) is viewed as containing representations of entities , along with their properties and relations they participate in .                                              |
|      | Some type of words are very productive , such as numbers , DM ( determinative measurement ) , proper names .                                                                                |
|      | The DM is an extended and modified version of an earlier prototype developed by Jensen and Binot for the resolution of prepositional-phrase attachment ambiguities ( Jensen & Bmot 1987 ) . |
| SVM  | SVM is one of the binary classifiers based on maximum margin strategy introduced by Vapnik [ 16 ] .                                                                                         |
|      | Similar to the PAUM , SVM is a maximal margin algorithm .                                                                                                                                   |
|      | The SVM ( Vapnik , 1995 ) performs optimization to find a hyperplane with the largest margin that separates training examples into two classes .                                            |

Table 2: Extracted definitions for some terms
